# Supplementary material
Source: MDPI journal article supplement (https://www.mdpi.com/2071-1050/10/6/2077)
Supplement: s1 [file s1]

Supplementary Material

# Suitability of Different Agricultural and Urban Organic Wastes as Feedstocks for the Production of Biochar—Part 2: Agronomical Evaluation as Soil Amendment

Inés López-Cano, María Luz Cayuela, María Sánchez-García and Miguel A. Sánchez-Monedero \*

Department of Soil and Water Conservation and Organic Waste Management, Centro de Edafología y Biología Aplicada del Segura, CSIC, P.O. Box 4195, 30080 Murcia, Spain; ines.lopezcano@hotmail.es (I.L.-C.); mlcayuela@cebas.csic.es (M.L.C.); msgarcia@cebas.csic.es (M.S.-G.)

\* Correspondence: monedero@cebas.csic.es; Tel.: +34-968-396200

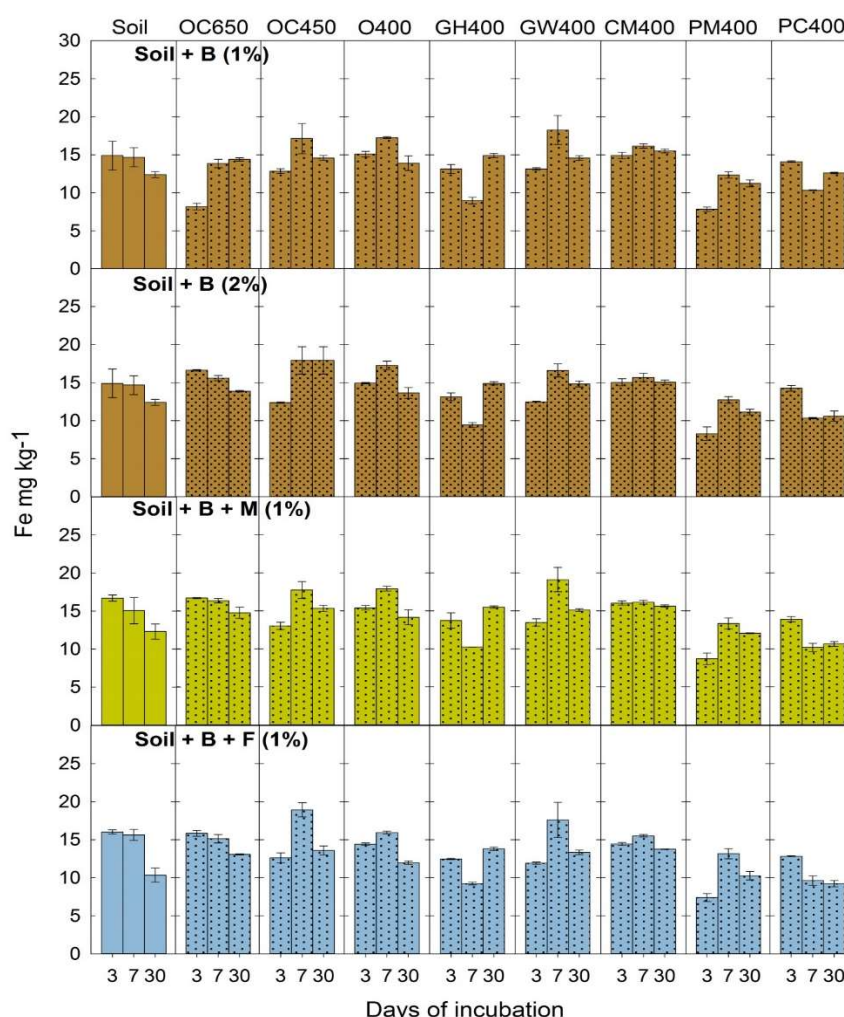

**Figure S1:** Concentration of DTPA- extractable Fe in soil during the incubation. The different treatments included: a control (soil without any amendment), soil with biochars at two doses (S+B (1%) and S+B (2%)), soil with manure (S+M (1%)) or mineral fertiliser (S+F (1%)) or soil with biochar in combination with manure (S+B+M (1%)) or with mineral fertiliser (S+B+F (1%)). Error bars represent standard deviation (n=3).

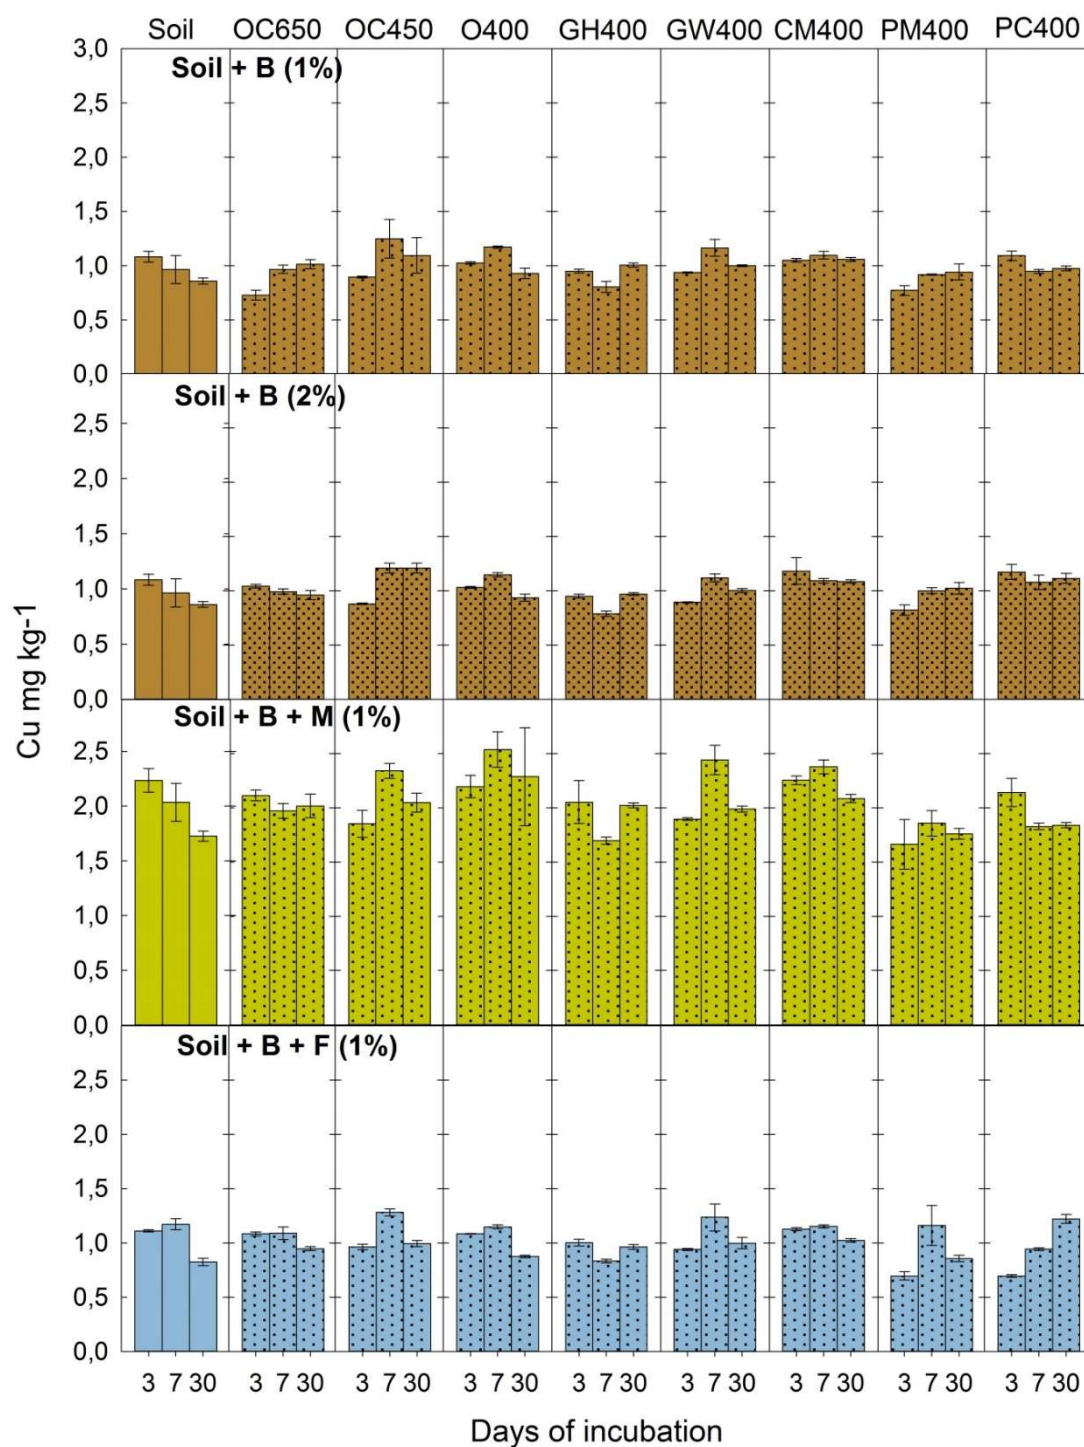

**Figure S2:** Concentration of DTPA- extractable Cu in soil during the incubation. The different treatments included: a control (soil without any amendment), soil with biochars at two doses (S+B (1%) and S+B (2%)), soil with manure (S+M (1%)) or mineral fertiliser (S+F (1%)) or soil with biochar in combination with manure (S+B+M (1%)) or with mineral fertiliser (S+B+F (1%)). Error bars represent standard deviation (n=3).

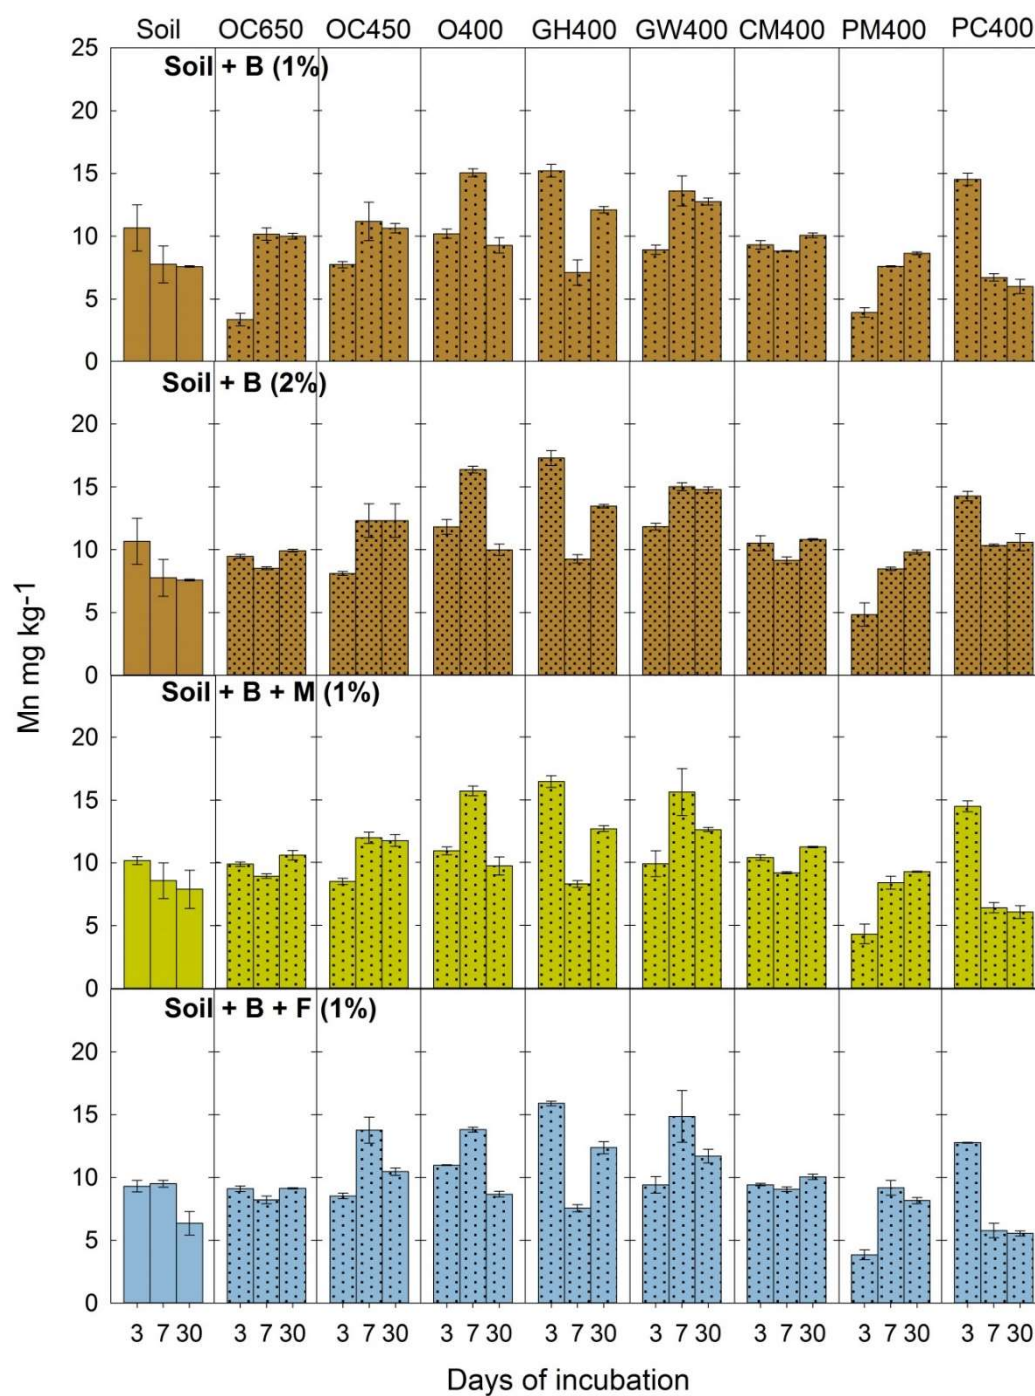

**Figure S3:** Concentration of DTPA- extractable Mn in soil during the incubation. The different treatments included: a control (soil without any amendment), soil with biochars at two doses (S+B (1%) and S+B (2%)), soil with manure (S+M (1%)) or mineral fertiliser (S+F (1%)) or soil with biochar in combination with manure (S+B+M (1%)) or with mineral fertiliser (S+B+F (1%)). Error bars represent standard deviation (n=3).



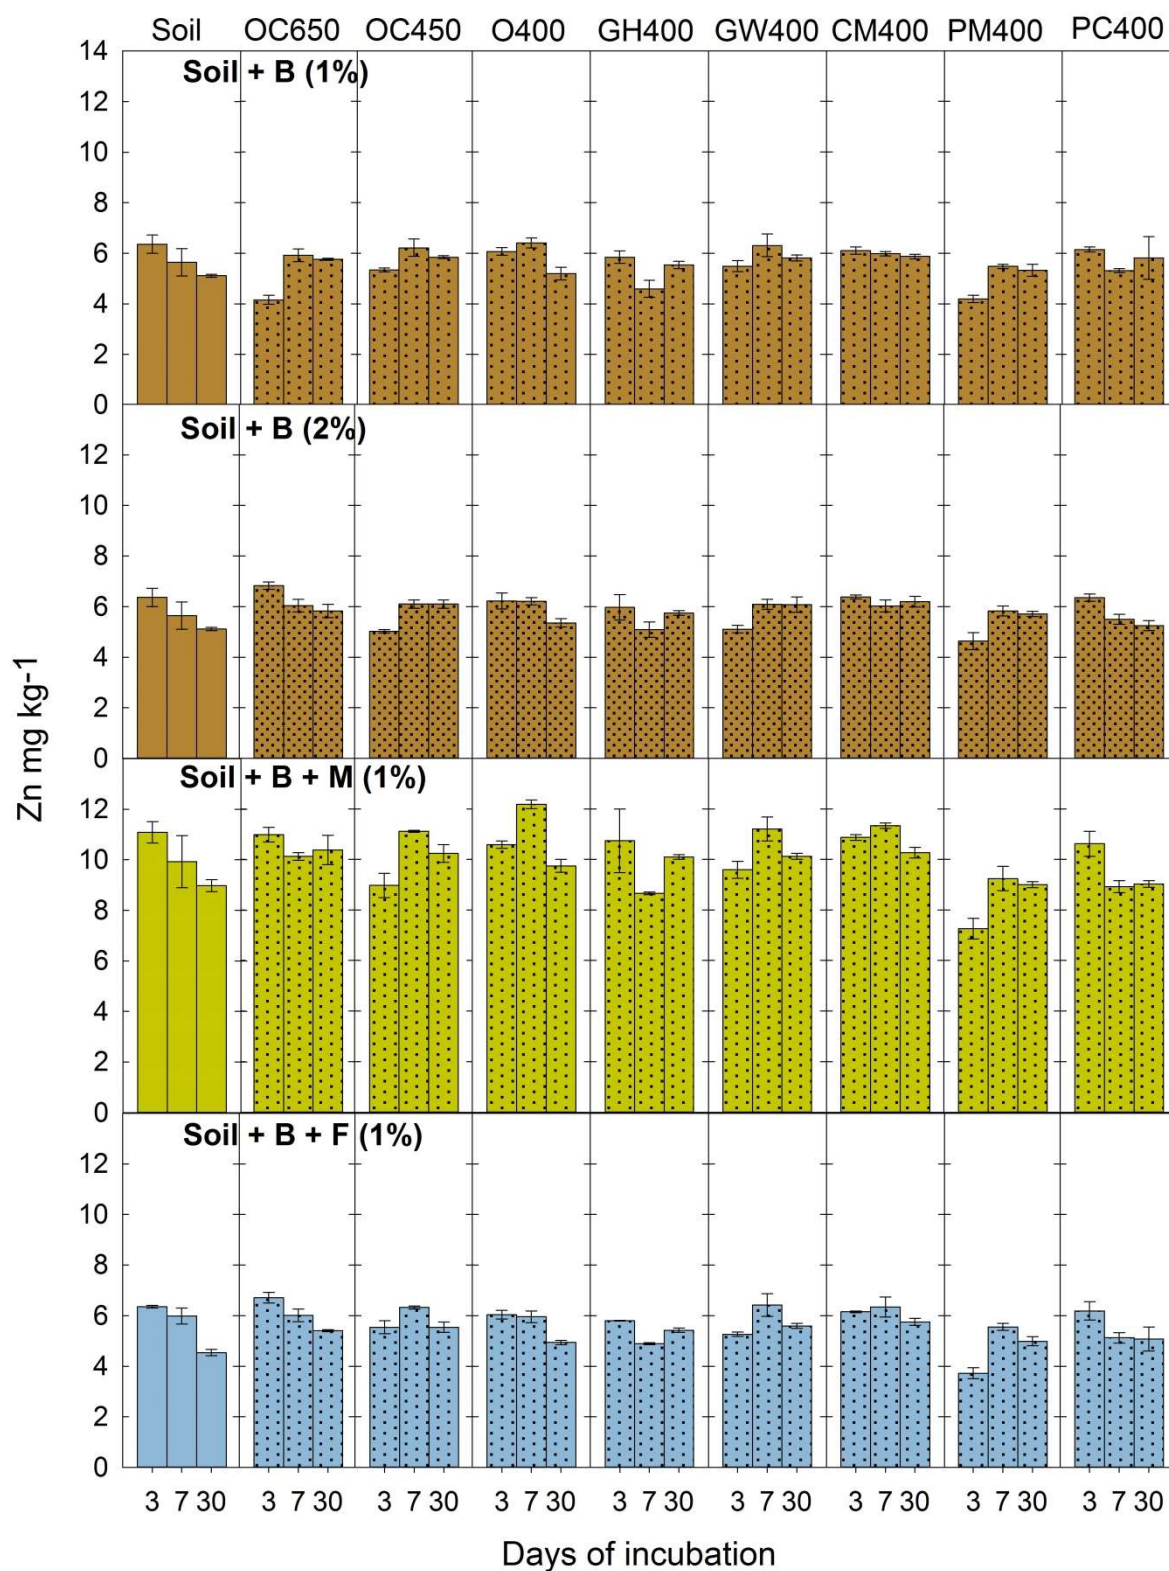

**Figure S4:** Concentration of DTPA- extractable Zn in soil during the incubation. The different treatments included: a control (soil without any amendment), soil with biochars at two doses (S+B (1%) and S+B (2%)), soil with manure (S+M (1%)) or mineral fertiliser (S+F (1%)) or soil with biochar in combination with manure (S+B+M (1%)) or with mineral fertiliser (S+B+F (1%)). Error bars represent standard deviation (n=3).

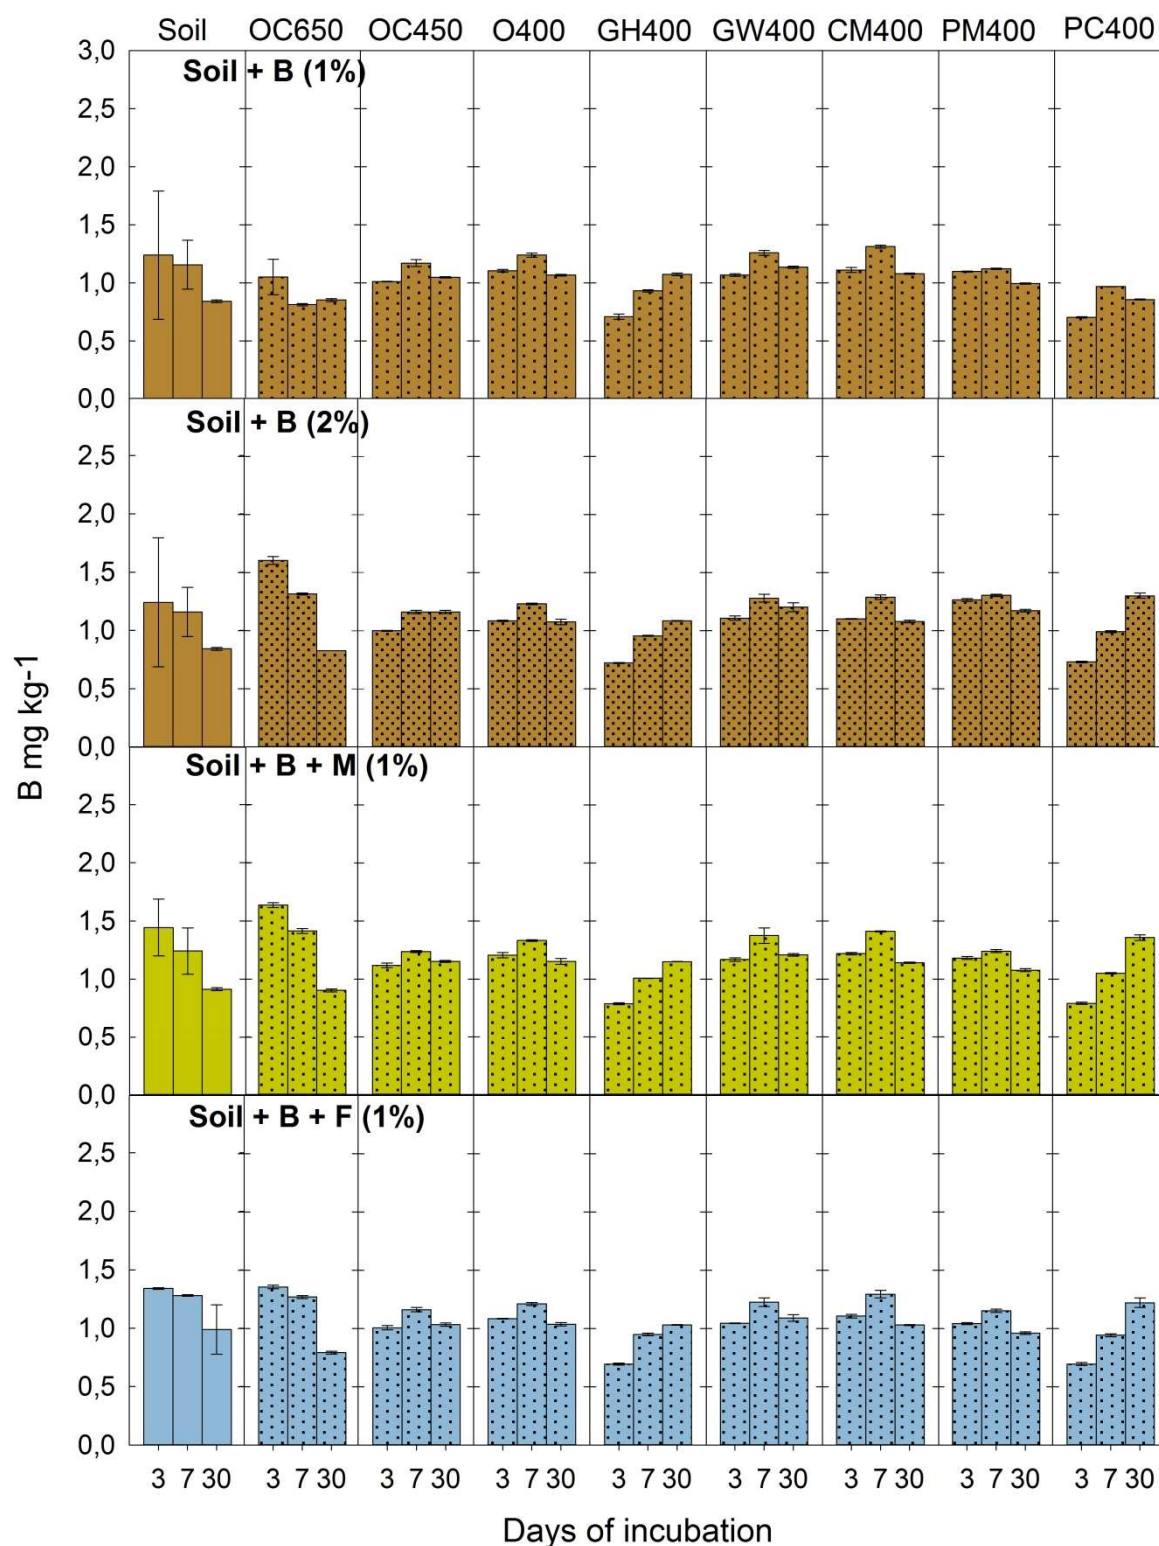

**Figure S5:** Concentration of DTPA- extractable B in soil during the incubation. The different treatments included: a control (soil without any amendment), soil with biochars at two doses (S+B (1%) and S+B (2%)), soil with manure (S+M (1%)) or mineral fertiliser (S+F (1%)) or soil with biochar in combination with manure (S+B+M (1%)) or with mineral fertiliser (S+B+F (1%)). Error bars represent standard deviation (n=3).

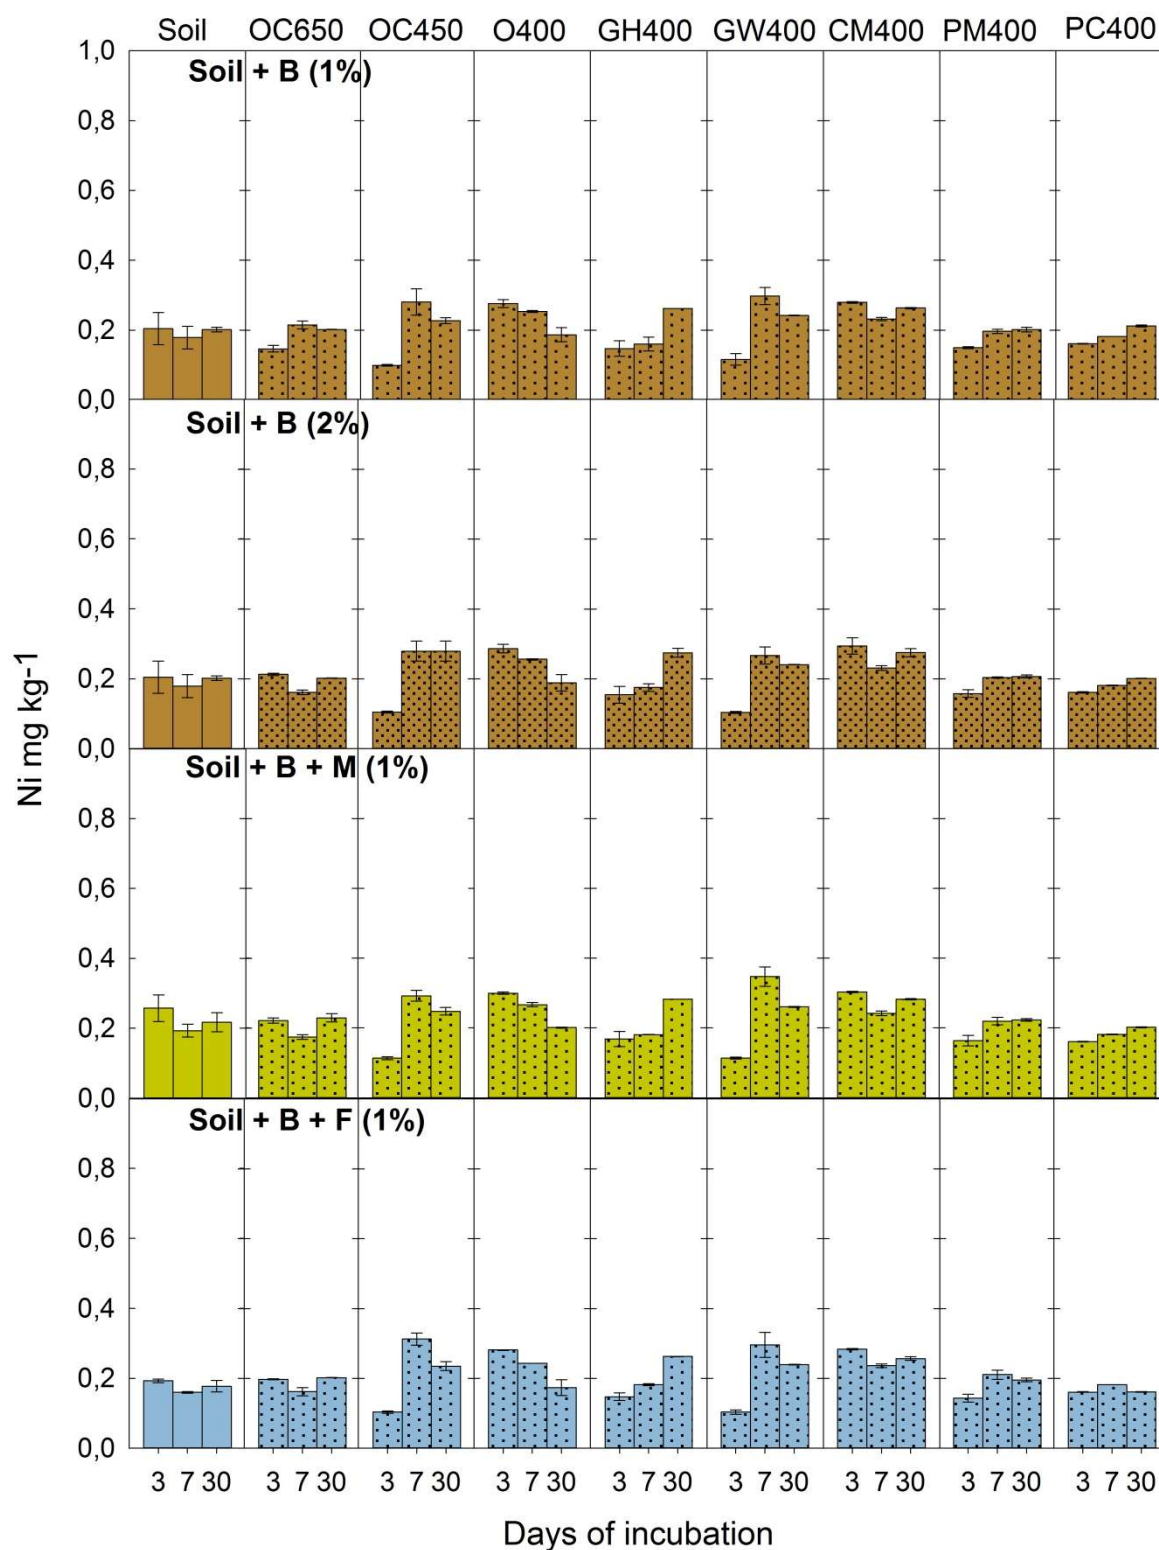

**Figure S6:** Concentrations of DTPA- extractable Ni in soil during the incubation. The different treatments included: a control (soil without any amendment), soil with biochars at two doses (S+B (1%) and S+B (2%)), soil with manure (S+M (1%)) or mineral fertiliser (S+F (1%)) or soil with biochar in combination with manure (S+B+M (1%)) or with mineral fertiliser (S+B+F (1%)). Error bars represent standard deviation (n=3).



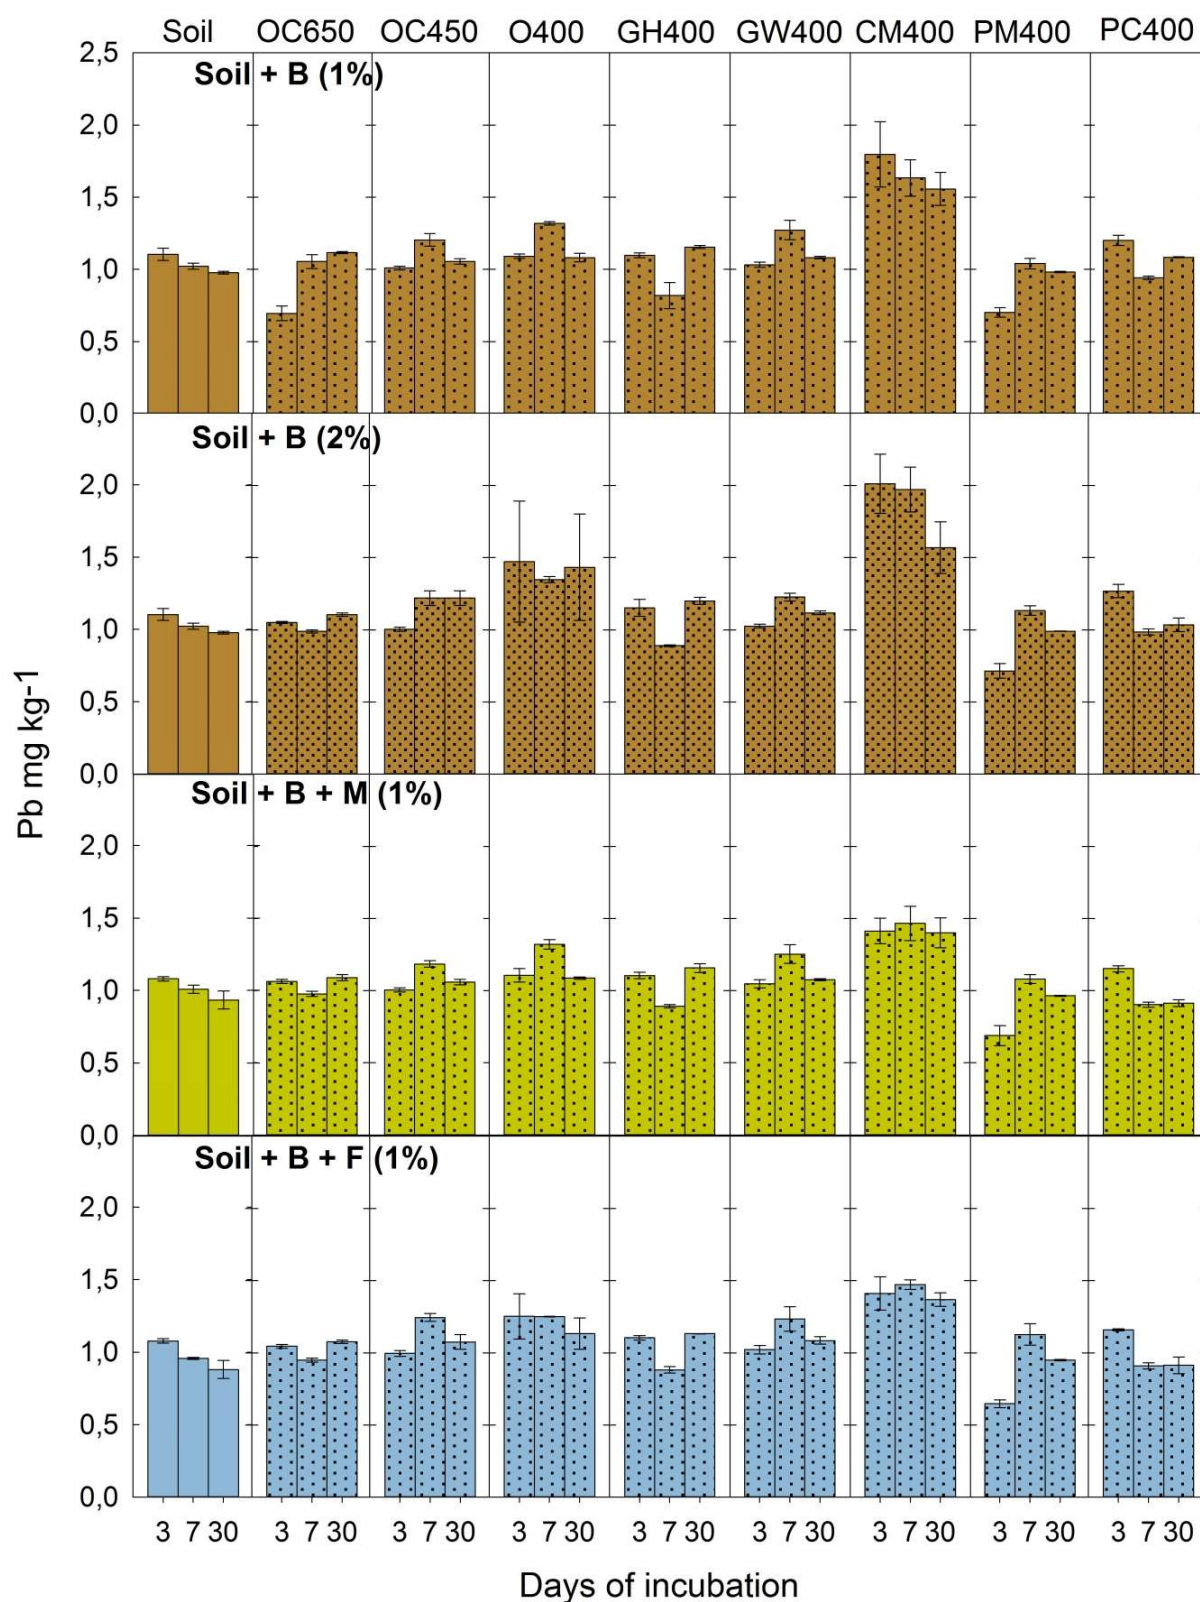

**Figure S7:** Concentration of DTPA- extractable Pb in soil during the incubation. The different treatments included: a control (soil without any amendment), soil with biochars at two doses (S+B (1%) and S+B (2%)), soil with manure (S+M (1%)) or mineral fertiliser (S+F (1%)) or soil with biochar in combination with manure (S+B+M (1%)) or with mineral fertiliser (S+B+F (1%)). Error bars represent standard deviation (n=3)

**Table S1:** Percentage of DTPA-extractable micronutrients (Fe, Cu, Mn, Zn and B) respect to total concentration in biochars.

| Biochar | Fe  | Cu  | Mn   | Zn   | B   |
|---------|-----|-----|------|------|-----|
|         | %   |     |      |      |     |
| OC650   | 0.9 | 7.1 | 12.8 | 39.5 | 1.5 |
| OC450   | 0.6 | 4.4 | 16.0 | 17.9 | 6.6 |
| O400    | 0.0 | 2.2 | 3.6  | 7.5  | 2.9 |
| GH400   | 0.0 | 2.8 | 22.3 | 5.2  | 3.4 |
| GW400   | 0.0 | 1.7 | 24.2 | 2.7  | 5.5 |
| CM400   | 1.1 | 1.5 | 2.0  | 1.1  | 2.8 |
| PM400   | 0.1 | 3.0 | 12.5 | 4.8  | 8.7 |
| PC400   | 0.2 | 2.8 | 5.7  | 2.8  | 7.1 |

**Table S2:** Percentage of DTPA-extractable heavy metals (Cd, Cr, Ni and Pb) respect to the total concentration in biochars.

| Biochar | Cd               | Cr  | Ni  | Pb   |
|---------|------------------|-----|-----|------|
|         | %                |     |     |      |
| OC650   | BDL <sup>1</sup> | BDL | 4.8 | 8.3  |
| OC450   | BDL              | BDL | 2.1 | 9.1  |
| O400    | BDL              | BDL | 1.2 | 15.6 |
| GH400   | BDL              | BDL | 1.1 | 10.3 |
| GW400   | 6.3              | 0.1 | 0.5 | 2.9  |
| CM400   | 7.9              | 0.0 | 0.4 | 10.2 |
| PM400   | BDL              | BDL | 0.5 | 4.2  |
| PC400   | 0.7              | BDL | 0.7 | 5.0  |

<sup>1</sup>BDL: total concentration in biochars were below the detection limit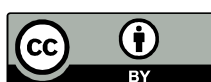

© 2018 by the authors. Submitted for possible open access publication under the terms and conditions of the Creative Commons Attribution (CC BY) license (<http://creativecommons.org/licenses/by/4.0/>).
